# Supplementary material for: The preparation of AuNPs/B-dNACNs and their application in P-aminophenol electrochemical sensing
Source: Royal Society of Chemistry journal article supplement (doi:10.1039/d3nj03366j), 2023-01-01
Supplement: d3nj03366j1.pdf [file d3nj03366j1.pdf]

## The Preparation of AuNPs/B-dNACNs and Its Application in P-aminophenol Electrochemical Sensing

Wenli Hou<sup>a</sup>, Xianyu Kang<sup>a</sup>, Huiyan Fang<sup>a</sup>, Jiajie Lin<sup>a</sup>, Yancai Li<sup>a,b,\*</sup>

<sup>a</sup> *Colleges of Chemistry, Chemical Engineering and Environment, Minnan Normal University, Zhangzhou, Fujian 363000, China*

<sup>b</sup> *Fujian Province Key Laboratory of Modern Analytical Science and Separation Technology, Zhangzhou, Fujian 363000, China*

*E-mail: liyancai@mnnu.edu.cn*

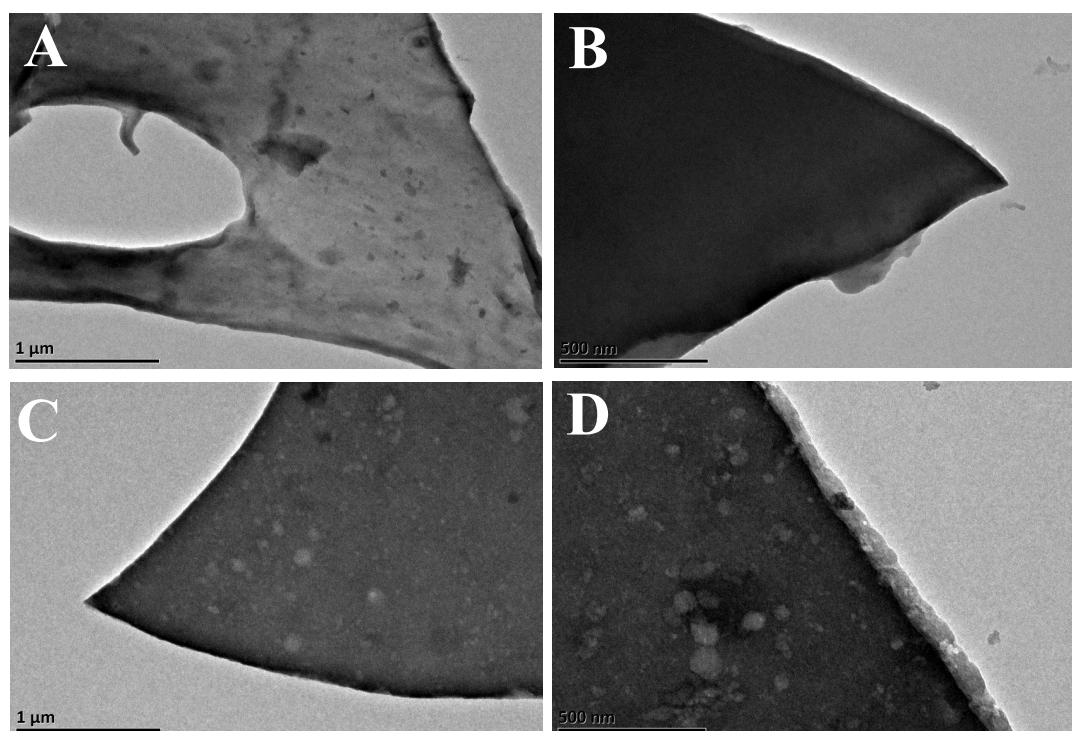

**Fig. S1** TEM images of the B-dC (A and B) and the B-dNAC (C and D).

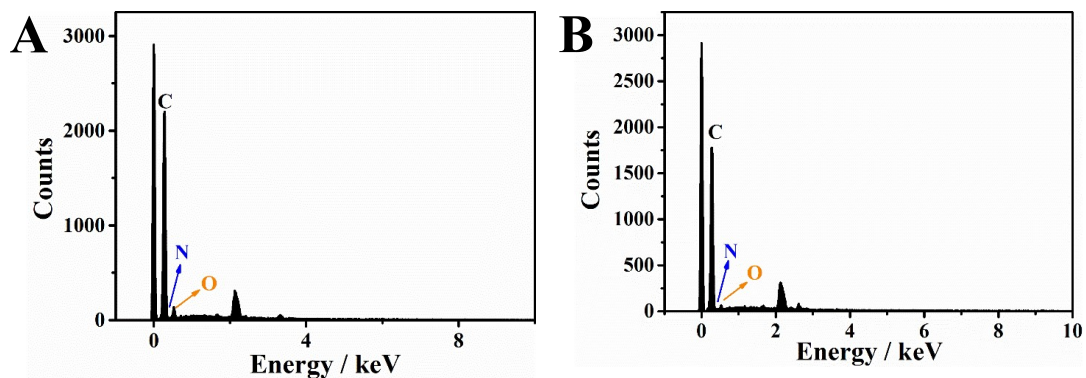

**Fig. S2** EDS spectrum of the B-dC (A) and the B-dNAC (B), (B-dC: C 89.51%, N 3.65%, O 6.85%; B-dNAC: C 89.95%, N 5.61%, O 4.43%)

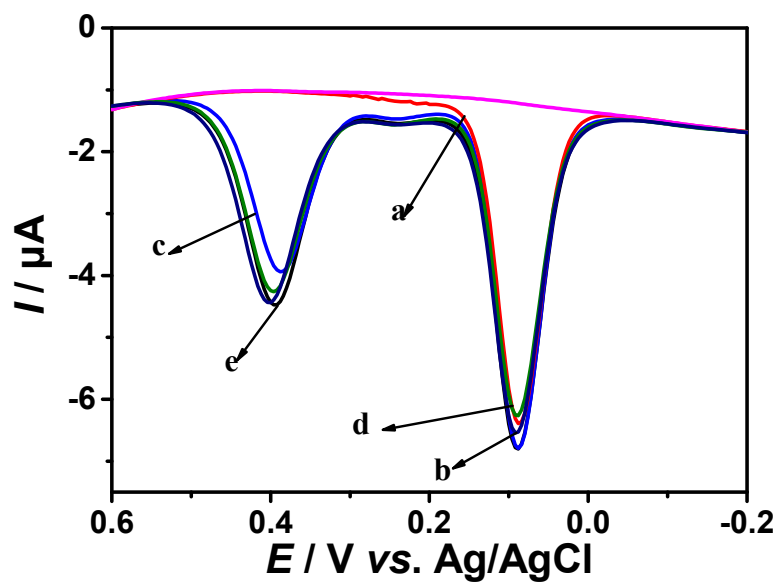

**Fig. S3** DPVs of the AuNPs/B-dNACNs/GCE in 0.1 M pH 7.0 PBS with 0.1 mM 4-AP (a); 0.1 mM 4-AP and 0.1 mM PA (b); 0.1 mM 4-AP, 0.1mM PA and 0.1mM AA (c); 0.1 mM 4-AP, 0.1mM PA, 0.1mM AA and 100 times urea (d); 0.1 mM 4-AP, 0.1mM PA, 0.1mM AA, 100 times urea and glucose (e)
